# Supplementary material
Source: MDPI journal article supplement (https://www.mdpi.com/2304-6775/9/4/51)
Supplement: s1 [file s1]

Archive with 2 entries (2 files):
- Supplemental file_Figures S1-S25.pdf
- Supplemental file_Table S1.pdf
