# Supplementary material
Source: MDPI journal article supplement (https://www.mdpi.com/2304-6775/9/4/51)
Supplement: s1 [file s1]

**Table S1.** Top 5 publishers, collaborating countries, and funding sponsors of the remaining 20 subject areas.

| No | Subject area                                  | Number of articles | Top 5 publishers (percentage of total)                                                                                                                                                                                                              | Top 5 collaborating countries (number of articles, percentage of total)                                                                                    | Top 5 funding sponsors (number of articles, percentage of total funding for a subject area)                                                                                                                                                                                 |
|----|-----------------------------------------------|--------------------|-----------------------------------------------------------------------------------------------------------------------------------------------------------------------------------------------------------------------------------------------------|------------------------------------------------------------------------------------------------------------------------------------------------------------|-----------------------------------------------------------------------------------------------------------------------------------------------------------------------------------------------------------------------------------------------------------------------------|
| 6  | Biochemistry, genetics, and molecular biology | 2602               | Zhengzhou University (15.52%)<br>Oriental Scientific Publishing Company (6.76%)<br>Research Journal of Pharmaceutical, Biological and Chemical Sciences (5.41%)<br>Elsevier (5.14%)<br>Foundation for Environmental Protection and Research (4.38%) | The Russian Federation (431, 16.56%), The United States of America (267, 10.26%), Germany (122, 4.68%), The United Kingdom (113, 4.34%), China (89, 3.42%) | Ministry of Education and Science of the Republic of Kazakhstan (277, 10.64%), National Institute of Health (71, 2.72%), US Department of Health and Human Services (68, 2.61%), Nazarbayev University (47, 1.8%), Russian Foundation for basic research (46, 1.76%)        |
| 7  | Mathematics                                   | 2320               | Springer (10.56%)<br>Elsevier (4.82%)<br>Little Lion Scientific (3.18%)<br>Taylor and Francis Inc. (3.14%)<br>Pleiades journals (3.06%)                                                                                                             | The Russian Federation (438, 18.87%), The United States of America (125, 5.38%), The United Kingdom (114, 4.91%), Turkey (79, 3.40%), Germany (66, 2.84%)  | Ministry of Education and Science of the Republic of Kazakhstan (379, 16.33%), Nazarbayev University (71, 2.71%), Engineering and Physical Sciences Research Council (62, 2.67%), Russian Foundation for basic research (55, 2.37%), UK research and innovation (50, 2.15%) |
| 8  | Environmental science                         | 2060               | IJESE (11.6%)<br>Elsevier (7.47%)<br>Springer (6.01%)<br>Foundation for Environmental Protection and Research (5.53%)<br>ASERS Publishing House (5.97%)                                                                                             | The Russian Federation (316, 15.39%), The United States of America (136, 6.6%), The United Kingdom (120, 5.82%), Germany (97, 4.70%), China (93, 4.51%)    | Ministry of Education and Science of the Republic of Kazakhstan (183, 8.88%), Nazarbayev University (51, 2.47%), European Commission (29, 1.40%), National Natural Science Foundation of China (25, 1.21%), Chinese Academy of Sciences (21, 1.01%)                         |

|    |                                      |      |                                                                                                                                                                                                                                           |                                                                                                                                                                                   |                                                                                                                                                                                                                                                                                                                                       |
|----|--------------------------------------|------|-------------------------------------------------------------------------------------------------------------------------------------------------------------------------------------------------------------------------------------------|-----------------------------------------------------------------------------------------------------------------------------------------------------------------------------------|---------------------------------------------------------------------------------------------------------------------------------------------------------------------------------------------------------------------------------------------------------------------------------------------------------------------------------------|
| 9  | Agricultural and biological sciences | 1951 | Springer (12.90%)<br>Foundation for Environmental Protection and Research (5.84%)<br>Oriental Scientific Publishing Company (5.63%)<br>EM International (5.17%)<br>Elsevier (4.25%)                                                       | The Russian Federation (367, 18.80%), The United States of America (185, 9.48%), China (120, 6.15%), Germany (106, 5.43%), The United Kingdom (101, 5.17%)                        | Ministry of Education and Science of the Republic of Kazakhstan (219, 11.22%), National Natural Science Foundation of China (31, 1.58%), Russian foundation for basic research (31, 1.58%), Chinese Academy of Science (28, 1.43%), Russian Science Foundation (21, 1.07%)                                                            |
| 10 | Earth and planetary sciences         | 1799 | National Academy of Sciences of the Republic of Kazakhstan (27.84%)<br>Elsevier (7.44%)<br>Springer (5.72%)<br>Maik Nauka-Interperiodica Publishing (2.89%)<br>Natsional'nyi Hirnychiy Universytet (2.89%)<br>Pleiades Publishing (2.83%) | The Russian Federation (452, 25.12%), The United States of America (161, 8.94%), China (130, 7.22%), Germany (123, 6.83%), Ukraine (76, 4.22%)                                    | Ministry of Education and Science of the Republic of Kazakhstan (155, 8.61%), National Natural Science Foundation of China (52, 2.89%), Russian foundation for basic research (50, 2.77%), Nazarbayev University (36, 2%), National Science Foundation (35, 1.94%)                                                                    |
| 11 | Chemical Engineering                 | 1793 | al-Farabi Kazakh State National University (13.77%)<br>Elsevier (10.20%)<br>MDPI AG (6.07%)<br>University of Chemical Technology and Metallurgy (6.02%)<br>Pleiades Publishing (4.29%)                                                    | The Russian Federation (316, 17.62%), The United States of America (107, 5.96%), China (102, 5.68%), The United Kingdom (68, 3.79%), Germany (58, 3.23%)                          | Ministry of Education and Science of the Republic of Kazakhstan (310, 17.28%), Nazarbayev University (69, 3.84%), National Natural Science Foundation of China (45, 2.50%), European Commission (23, 1.28%), Ministry of Education and Science of the Russian Federation (21, 1.17%)                                                  |
| 12 | Medicine                             | 1924 | Elsevier (7.79%)<br>BioMed Central (4.78%)<br>Springer (4.46%)<br>Lifescience Global (3.06%)<br>Oxford University Press (2.39%)                                                                                                           | The Russian Federation (391, 20.32%), The United States of America (391, 20.32%), The United Kingdom (250, 12.99%), Germany (193, 10.03%), Italy (192, 9.97%), Japan (153, 7.95%) | Ministry of Education and Science of the Republic of Kazakhstan (121, 6.28%), National Institutes of Health (105, 5.45%), U.S. Department of Health and Human Services (92, 4.78%), Medical Research Council (40, 2.07%), European Commission (34, 1.76%), Ministry of Education, Culture, Sports, Science and Technology (34, 1.76%) |

|    |                                      |      |                                                                                                                                                                                                                             |                                                                                                                                                                         |                                                                                                                                                                                                                                                                                                                                                                                                                                                                                 |
|----|--------------------------------------|------|-----------------------------------------------------------------------------------------------------------------------------------------------------------------------------------------------------------------------------|-------------------------------------------------------------------------------------------------------------------------------------------------------------------------|---------------------------------------------------------------------------------------------------------------------------------------------------------------------------------------------------------------------------------------------------------------------------------------------------------------------------------------------------------------------------------------------------------------------------------------------------------------------------------|
| 13 | Economics, economics, and finance    | 1663 | ASERS Publishing House (28.14%)<br>National Academy of Management (13.28%)<br>Mediterranean Center of Social and Educational Research (5.77%)<br>Entrepreneurship and Sustainability Center (5.11%)<br>Econjournals (4.63%) | The Russian Federation (135, 8.11%), The United States of America (48, 2.88%), The United Kingdom (29, 1.74%), Turkey (22, 1.32%), Kyrgyzstan (16, 0.96%)               | Ministry of Education and Science of the Republic of Kazakhstan (51, 3.06%), Nazarbayev University (11, 0.66%), European Commission (6, 0.36%), Government of Canada (3, 0.18%), Johnson Space Center (3, 0.18%), Ministry of Education (3, 0.18%), Ministry of Education and Science of the Russian Federation (3, 0.18%), Ministry of Education, Culture, Sports, Science and Technology (3, 0.18%), Ministry of Finance (3, 0.18%), National Institutes of Health (3, 0.18%) |
| 14 | Arts and humanities                  | 1539 | Universidad del Zulia (23.70%)<br>Serials Publications (12.28%)<br>Canadian Center of Science and Education (7.21%)<br>Mediterranean Center of Social and Educational Research (6.23%)<br>Ecozone, OAIMDD (3.70%)           | The Russian Federation (154, 10%), The United States of America (53, 3.44%), The United Kingdom (26, 1.68%), Turkey (19, 1.23%), Germany (15, 0.97%), China (14, 0.90%) | Ministry of Education and Science of the Republic of Kazakhstan (25, 1.62%), Kazan Federal University (20, 1.29%), Eesti Teadusagentuur (13, 0.84%), National Science Foundation (10, 0.64%), Nazarbayev University (9, 0.58%)                                                                                                                                                                                                                                                  |
| 15 | Computer science                     | 1206 | Institute of Electrical and Electronics Engineers Inc. 133 (11.02%)<br>Elsevier (7.21%)<br>Little Lion Scientific (6.13%)<br>MDPI AG (5.80%)<br>Springer (4.56%)                                                            | The Russian Federation (161, 13.34%), The United States of America (77, 6.38%), Ukraine (69, 5.72%), China (63, 5.22%), India (51, 4.22%)                               | Ministry of Education and Science of the Republic of Kazakhstan (161, 13.34%), Nazarbayev University (73, 6.05%), National Natural Science Foundation of China (18, 1.49%), Russian Foundation for Basic Research (17, 1.40%), European Commission (13, 1.07%)                                                                                                                                                                                                                  |
| 16 | Business, management, and accounting | 1190 | Revista Espacios (18.99%)<br>ASERS Publishing House (15.54%)<br>Entrepreneurship and Sustainability Center (7.14%)<br>Allied Business Academies (6.72%)<br>Emerald Group Holdings Ltd. (4.62%)                              | The Russian Federation (140, 11.76%), The United States of America (47, 3.94%), The United Kingdom (43, 3.61%), Ukraine (23, 1.93%), Turkey (20, 1.68%)                 | Ministry of Education and Science of the Republic of Kazakhstan (41, 3.44%), European Commission (7, 0.58%), Nazarbayev University (5, 0.42%), Government of Canada (4, 0.33%), Ministry of Education and Science of the Russian Federation (4, 0.33%), Government Council on Grants, Russian Federation (3, 0.25%), Natural Sciences and Engineering Research Council of Canada (3, 0.25%), Russian Foundation for Basic Research (3, 0.25%)                                   |

|    |                                                               |      |                                                                                                                                                              |                                                                                                                                                                                                                          |                                                                                                                                                                                                                                                                                                                                                                                                                                                  |
|----|---------------------------------------------------------------|------|--------------------------------------------------------------------------------------------------------------------------------------------------------------|--------------------------------------------------------------------------------------------------------------------------------------------------------------------------------------------------------------------------|--------------------------------------------------------------------------------------------------------------------------------------------------------------------------------------------------------------------------------------------------------------------------------------------------------------------------------------------------------------------------------------------------------------------------------------------------|
| 17 | Energy                                                        | 1149 | Elsevier (15.31%)<br>Springer (5.65%)<br>MDPI AG (5.57%)<br>Econjournals (4.78%)<br>E.A.Buketov Karaganda<br>State University Publish<br>House (4.43%)       | The Russian<br>Federation (257,<br>22.36%), The<br>United States of<br>America (88,<br>7.65%), China<br>(54, 4.69%),<br>Japan (46, 40%),<br>Ukraine (31,<br>2.69%)                                                       | Ministry of Education and Science<br>of the Republic of Kazakhstan<br>(161, 14.01%), Nazarbayev<br>University (41, 3.56%), Ministry of<br>Education and Science of the<br>Russian Federation (21, 1.82%),<br>National Natural Science<br>Foundation of China (17, 1.47%),<br>Ministry of Education, Culture,<br>Sports, Science and Technology<br>(15, 1.30%)                                                                                    |
| 18 | Pharma<br>cology,<br>toxicolo<br>gy, and<br>pharma<br>ceutics | 927  | Elsevier (16.18%)<br>BioMed Central (9.92%)<br>Springer (9.27%)<br>Lifescience Global<br>(6.36%)<br>Oxford University Press<br>(4.96%)                       | The Russian<br>Federation (126,<br>13.59%), The<br>United States of<br>America (48,<br>5.17%), Poland<br>(30, 3.23%), The<br>United<br>Kingdom (28,<br>3.02%), Italy (27,<br>2.91%)                                      | Ministry of Education and Science<br>of the Republic of Kazakhstan (58,<br>6.25%), National Institutes of<br>Health (10, 1.07%), U.S.<br>Department of Health and Human<br>Services (10, 1.07%), European<br>Commission (5, 0.53%), Ministry<br>of Education and Science of the<br>Russian Federation (4, 0.43%),<br>National Institute of General<br>Medical Sciences (4, 0.43%),<br>National Natural Science<br>Foundation of China (4, 0.43%) |
| 19 | Immun<br>ology<br>and<br>microbi<br>ology                     | 448  | Elsevier (8.92%)<br>Springer (6.47%)<br>American Society for<br>Microbiology (6.02%)<br>Blackwell Publishing Ltd<br>(4.46%)<br>BioMed Central Ltd<br>(4.01%) | The Russian<br>Federation (102,<br>22.76%), The<br>United States of<br>America (86,<br>19.19%), The<br>United<br>Kingdom (44,<br>9.82%), France<br>(43, 9.59%),<br>Germany (43,<br>9.59%),<br>Switzerland (38,<br>8.48%) | Ministry of Education and Science<br>of the Republic of Kazakhstan (75,<br>16.74%), National Institutes of<br>Health (19, 4.24%), U.S.<br>Department of Health and Human<br>Services (18, 4.01%), UK Research<br>and Innovation (14, 3.12%),<br>Medical Research Council (11,<br>2.45%)                                                                                                                                                          |

|    |                   |     |                                                                                                                                                                                                                |                                                                                                                                                                                                       |                                                                                                                                                                                                                                                                                                                                                                                                                                                                                                                              |
|----|-------------------|-----|----------------------------------------------------------------------------------------------------------------------------------------------------------------------------------------------------------------|-------------------------------------------------------------------------------------------------------------------------------------------------------------------------------------------------------|------------------------------------------------------------------------------------------------------------------------------------------------------------------------------------------------------------------------------------------------------------------------------------------------------------------------------------------------------------------------------------------------------------------------------------------------------------------------------------------------------------------------------|
| 20 | Decision sciences | 372 | Revista Espacios (60.75%)<br>ExcelingTech (7.79%)<br>Elsevier (5.10%)<br>LLC CPC Business Perspectives (2.68%)<br>Taylor and Francis Ltd. (2.41%)                                                              | The Russian Federation (35, 9.40%), The United States of America (17, 4.56%), France (9, 2.41%), Turkey (9, 2.41%), The United Kingdom (9, 2.41%), Canada (7, 1.88%)                                  | Ministry of Education and Science of the Republic of Kazakhstan (10, 2.68%), Nazarbayev University (7, 1.88%), European Commission (3, 0.80%), Government of Canada (3, 0.80%), Natural Sciences and Engineering Research Council of Canada (3, 0.80%), Engineering and Physical Sciences Research Council (2, 0.53%), National Natural Science Foundation of China (2, 0.53%), University of Ottawa (2, 0.53%), Al-Farabi Kazakh National University (1, 0.26%), Beijing Council of Science and Technology (1, 0.26%)       |
| 21 | Veterinary        | 176 | Elsevier (14.20%)<br>National Centre for Agrarian Sciences (7.39%)<br>Nexus Academic Publishers (7.95%)<br>Agricultural Academy, Bulgaria (5.11%)<br>Blackwell Publishing Ltd (4.54%)                          | The Russian Federation (19, 10.79%), The United States of America (16, 9.09%), Poland (14, 7.95%), Bulgaria (13, 7.38%), Switzerland (10, 5.68%)                                                      | Ministry of Education and Science of the Republic of Kazakhstan (26, 14.77%), UK Research and Innovation (4, 2.27%), Università di Pisa (4, 2.27%), Biotechnology and Biological Sciences Research Council (3, 1.70%), European Commission (3, 1.70%), Zoologische Gesellschaft Frankfurt (3, 1.70%), Centre for Dengue Research, University of Sri Jayewardenepura (2, 1.13%), International Fund for Agricultural Development (2, 1.13%), Natural Environment Research Council (2, 1.13%), Norges Forskningsråd (2, 1.13%) |
| 22 | Psychology        | 162 | Lifescience Global (36.40%)<br>Springer (11.11%)<br>Routledge (7.40%)<br>Elsevier (4.93%)<br>Association for the Development of Science, Engineering and Education (3.08%)<br>Blackwell Publishing Ltd (3.08%) | The United States of America (39, 24.07%), The Russian Federation (18, 11.11%), The United Kingdom (12, 7.40%), Germany (11, 6.79%), Italy (11, 6.79%), Australia (9, 5.55%), Saudi Arabia (9, 5.55%) | National Institutes of Health (11, 6.79%), U.S. Department of Health and Human Services (10, 6.17%), Ministry of Education and Science of the Republic of Kazakhstan (6, 3.70%), Eunice Kennedy Shriver National Institute of Child Health and Human Development (5, 3.08%), National Institute on Drug Abuse (4, 2.46%)                                                                                                                                                                                                     |

|    |                    |     |                                                                                                                                                               |                                                                                                                                                                                                                                                             |                                                                                                                                                                                                                                                                                                                                                                                                                                                                                                                                                                              |
|----|--------------------|-----|---------------------------------------------------------------------------------------------------------------------------------------------------------------|-------------------------------------------------------------------------------------------------------------------------------------------------------------------------------------------------------------------------------------------------------------|------------------------------------------------------------------------------------------------------------------------------------------------------------------------------------------------------------------------------------------------------------------------------------------------------------------------------------------------------------------------------------------------------------------------------------------------------------------------------------------------------------------------------------------------------------------------------|
| 23 | Neuroscience       | 153 | Lifescience Global (38.50%)<br>Elsevier (9.15%)<br>Springer (6.53%)<br>PeerJ Inc. (5.88%)<br>Hindawi Publishing Corporation (4.57%)                           | The United States of America (21, 13.72%), The Russian Federation (17, 11.11%), China (13, 8.49%), Italy (13, 8.49%), Germany (10, 6.53%), The United Kingdom (9, 5.88%)                                                                                    | Ministry of Education and Science of the Republic of Kazakhstan (13, 8.49%), National Institutes of Health (9, 5.88%), U.S. Department of Health and Human Services (9, 5.88%), Chinese Academy of Sciences (6, 3.92%), Eunice Kennedy Shriver National Institute of Child Health and Human Development (4, 2.61%), Medical Research Council (3, 1.96%), Nazarbayev University (3, 1.96%), UK Research and Innovation (3, 1.96%), West Light Foundation of the Chinese Academy of Sciences (3, 1.96%)                                                                        |
| 24 | Health professions | 153 | Tche Quimica Group (52.94%)<br>Editura Universitatii din Pitesti (7.84%)<br>SPER Publications (5.88%)<br>Oxford University Press (4.57%)<br>Routledge (3.26%) | The Russian Federation (38, 24.83%), The United States of America (5, 3.26%), India (4, 2.61%), The United Kingdom (4, 2.61%), Germany (3, 1.96%), Japan (3, 1.96%), Kyrgyzstan (3, 1.96%), Lithuania (3, 1.96%), Australia (2, 1.30%), Bulgaria (2, 1.30%) | Ministry of Education and Science of the Republic of Kazakhstan (22, 14.37%), Nazarbayev University (3, 1.96%), Government Council on Grants, Russian Federation (2, 1.30%), Japan Society for the Promotion of Science (2, 1.30%), National Institute of Allergy and Infectious Diseases (2, 1.30%), National Institutes of Health (2, 1.30%), Russian Foundation for Basic Research (2, 1.30%), U.S. Department of Health and Human Services (2, 1.30%), Al-Farabi Kazakh National University (1, 0.65%), Deanship of Scientific Research, King Saud University (1, 0.65%) |
| 25 | Nursing            | 96  | SET Publisher (10.41%)<br>Elsevier (6.25%)<br>Blackwell Publishing Ltd (6.25%)<br>Asian Network for Scientific Information (6.25%)<br>Springer (5.20%)        | The United States of America (22, 22.91%), Saudi Arabia (13, 13.50%), The United Kingdom (11, 11.45%), The Russian Federation (10, 10.41%), Iran (7, 7.29%)                                                                                                 | Ministry of Education and Science of the Republic of Kazakhstan (7, 7.29%), Deanship of Scientific Research, King Saud University (3, 3.12%), King Saud University (3, 3.12%), Ministeriet Sundhed Forebyggelse (3, 3.12%), National Institutes of Health (3, 3.12%), U.S. Department of Health and Human Services (3, 3.12%), Egészségügyi Tudományos Tanács (2, 2.08%), Fonds National de la Recherche Luxembourg (2, 2.08%), Ministry of Education, Culture, Sports, Science and Technology (2, 2.08%),                                                                   |
