# Supplementary material
Source: MDPI journal article supplement (https://www.mdpi.com/2304-6775/9/4/51)
Supplement: s1 [file s1]

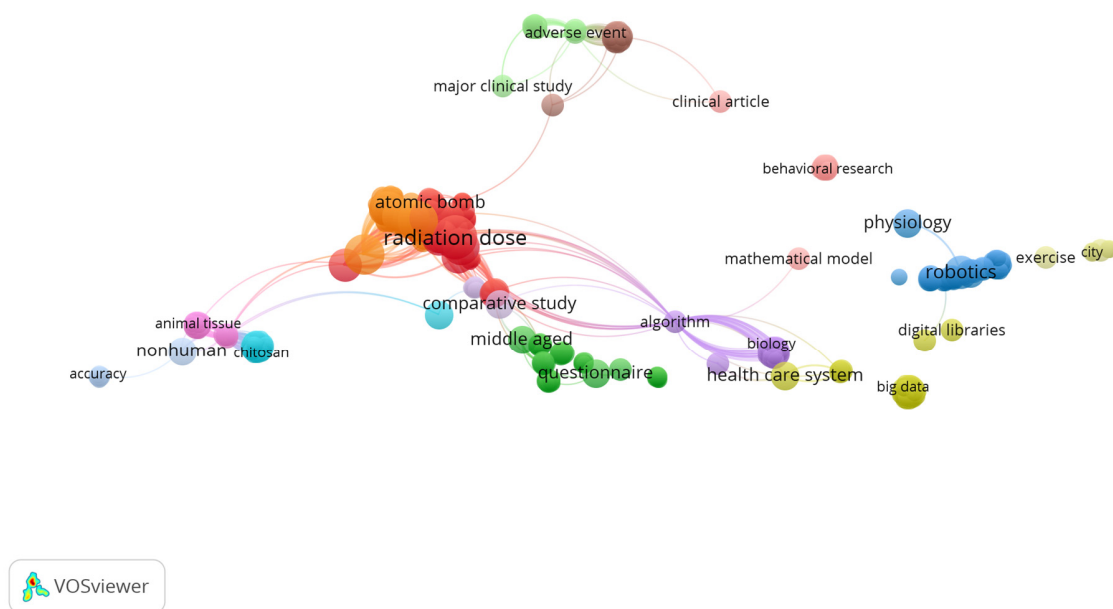

**Figure S1.** A keywords co-occurrence network for the subject area Health Professions.

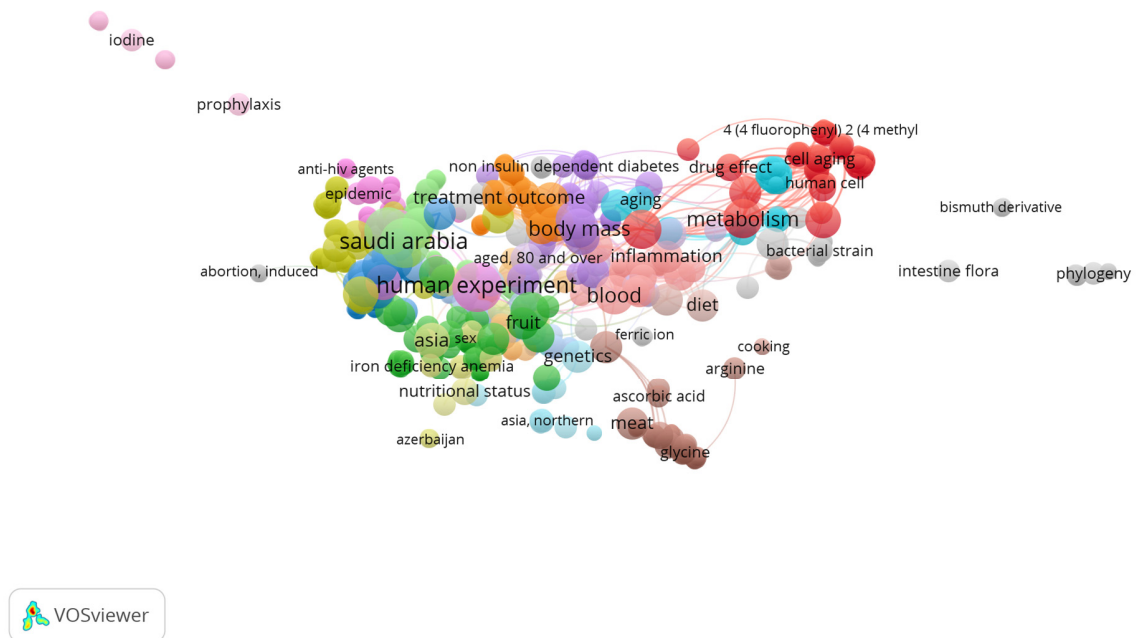

**Figure S2.** A keywords co-occurrence network for the subject area Nursing.









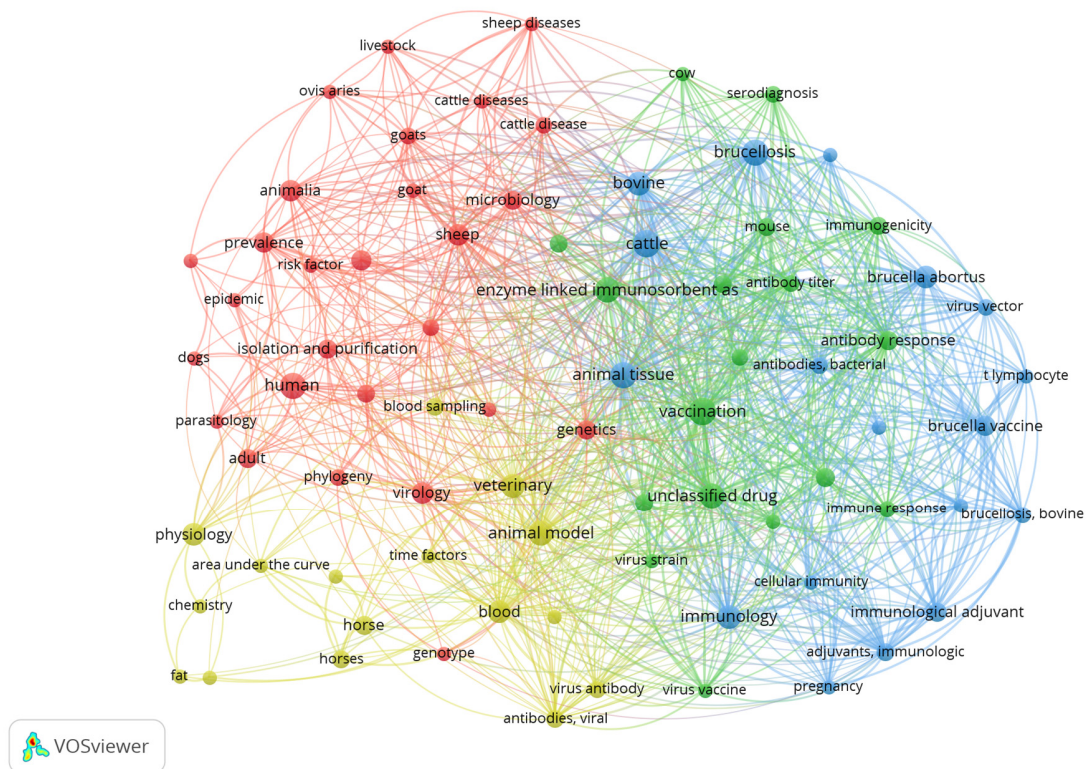

**Figure S6.** A keywords co-occurrence network for the subject area Veterinary.

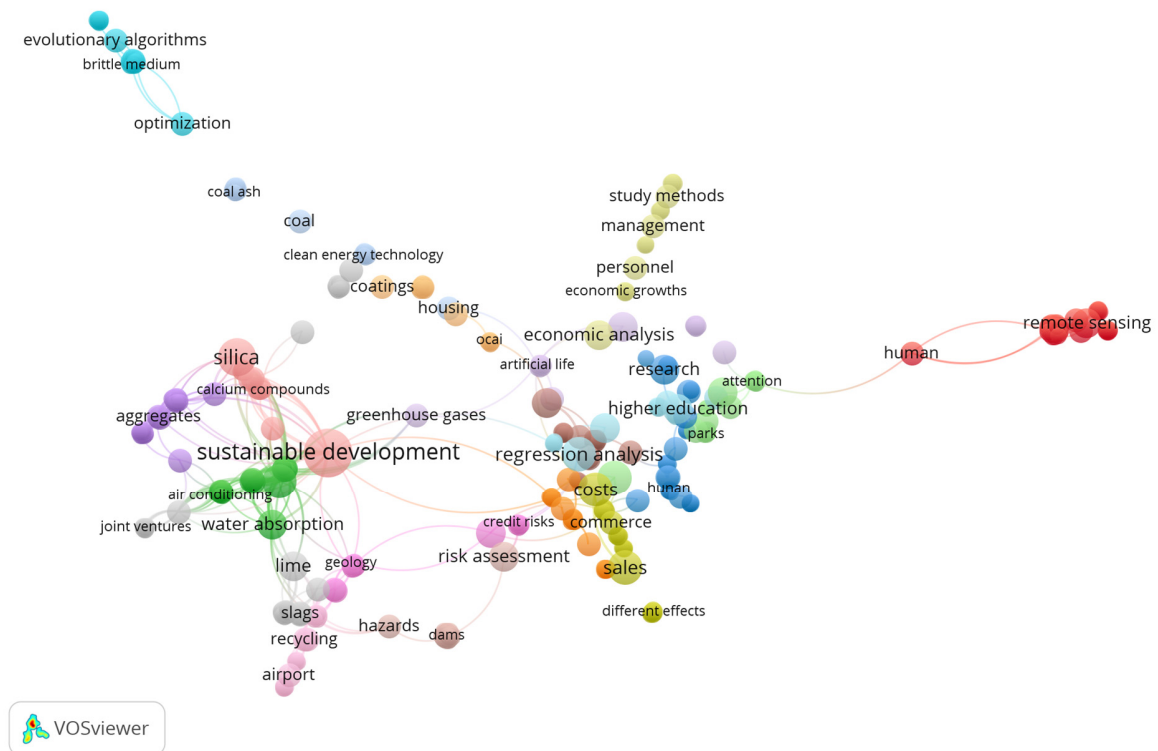

**Figure S7.** A keywords co-occurrence network for the subject area Business, management, and accounting.

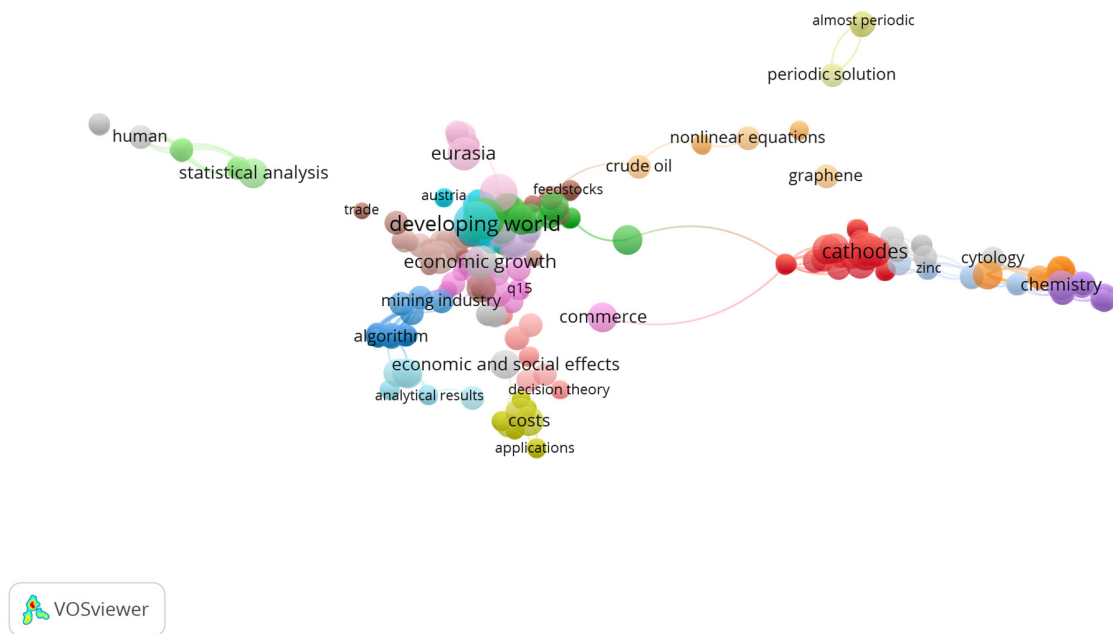

**Figure S8.** A keywords co-occurrence network for the subject area Economics.

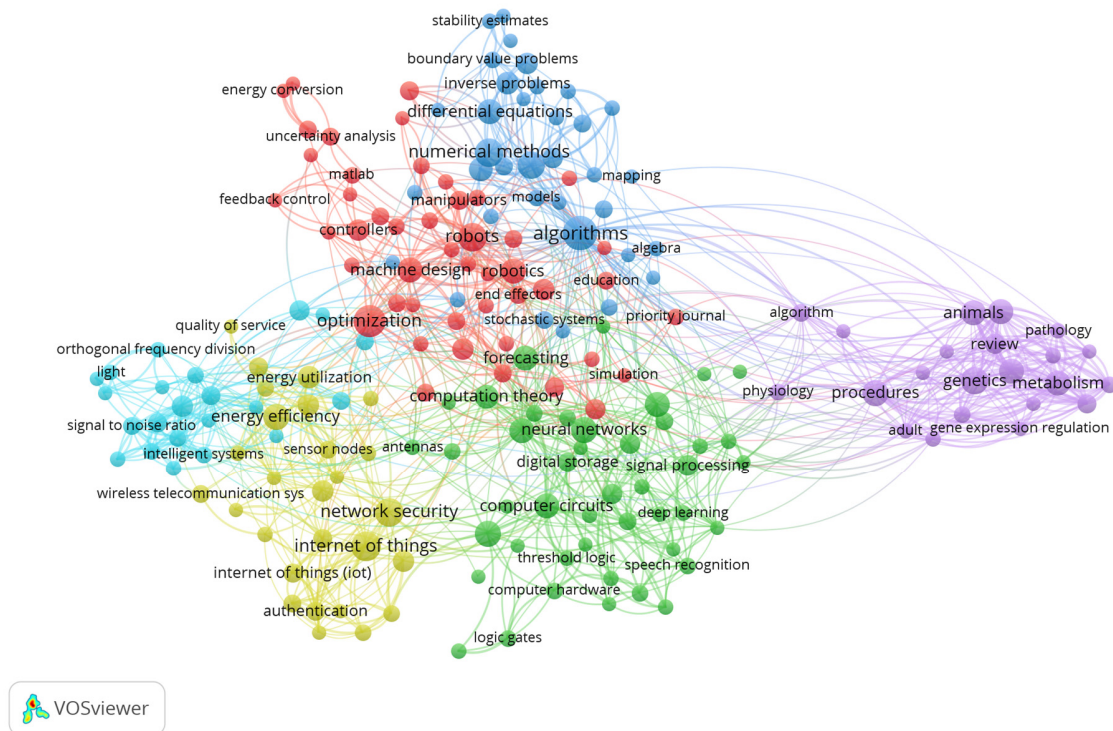

**Figure S9.** A keywords co-occurrence network for the subject area Computer science.

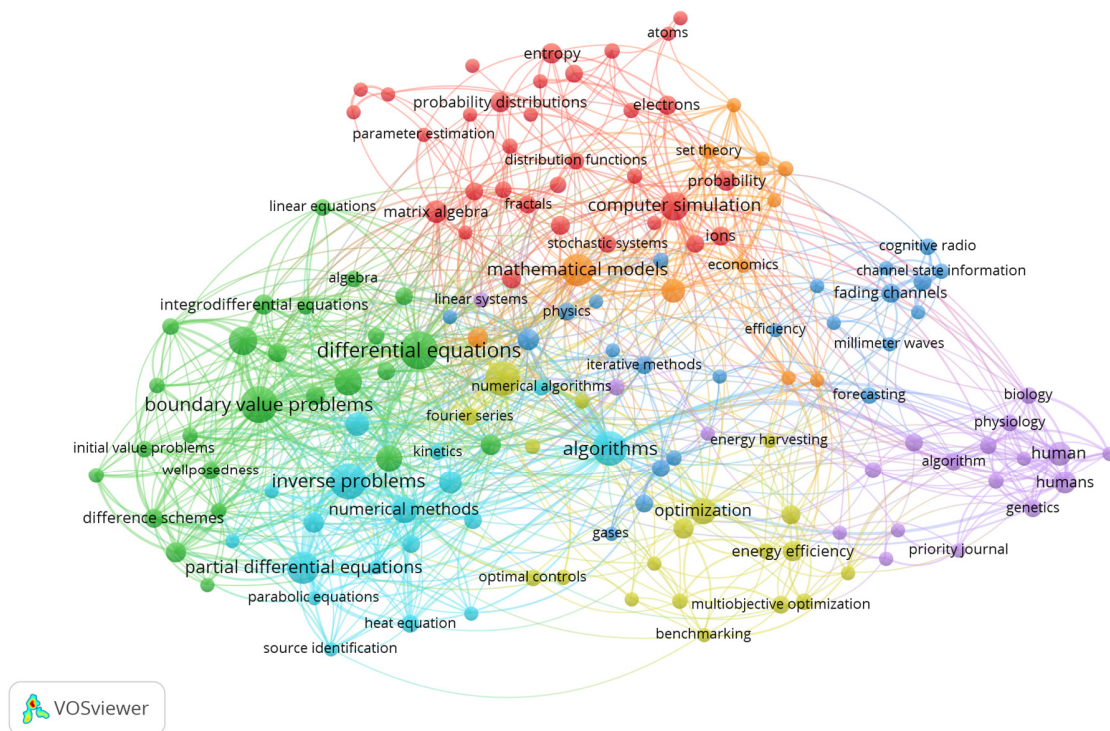

**Figure S10.** A keywords co-occurrence network for the subject area Mathematics.



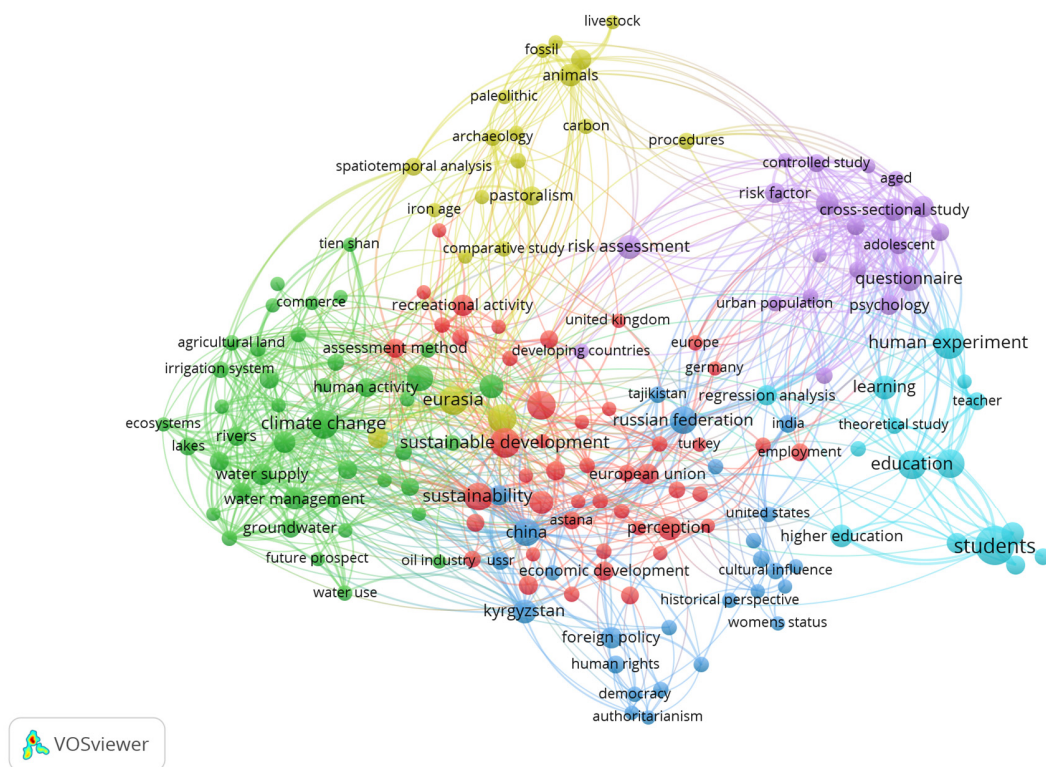

**Figure S11.** A keywords co-occurrence network for the subject area Social sciences.





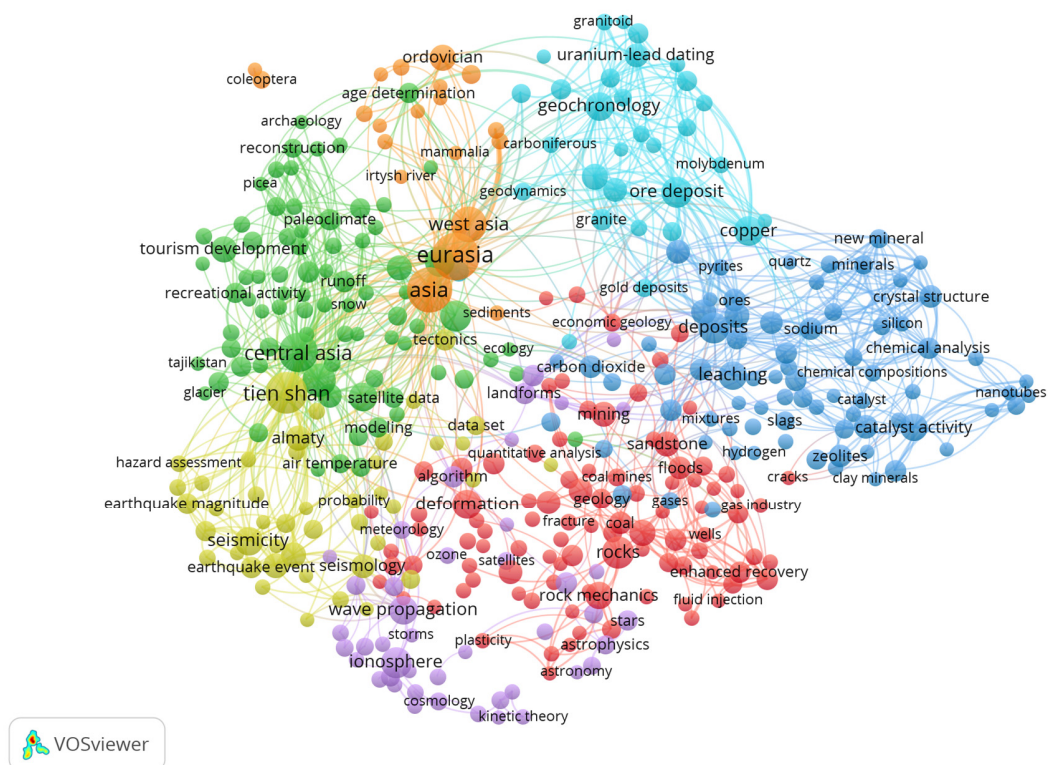

**Figure S13.** A keywords co-occurrence network for the subject area Earth and planetary.

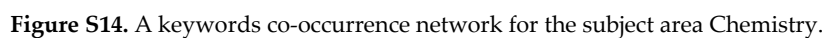

**Figure S14.** A keywords co-occurrence network for the subject area Chemistry.

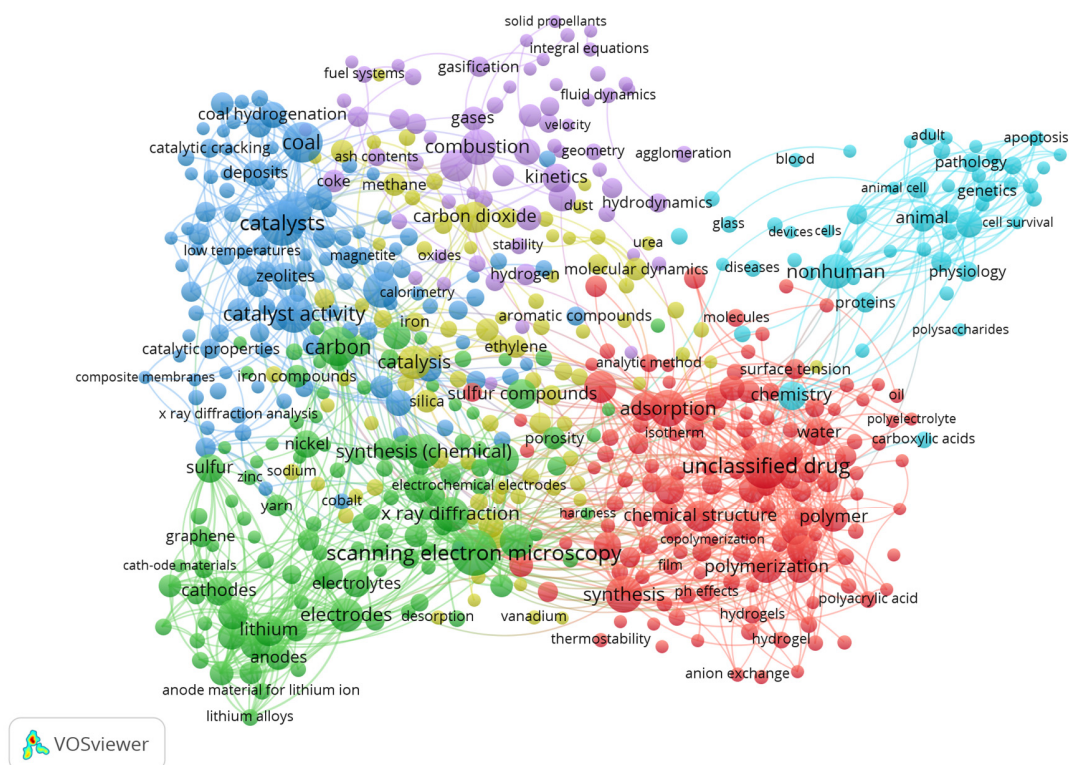

**Figure S15.** A keywords co-occurrence network for the subject area Chemical engineering.







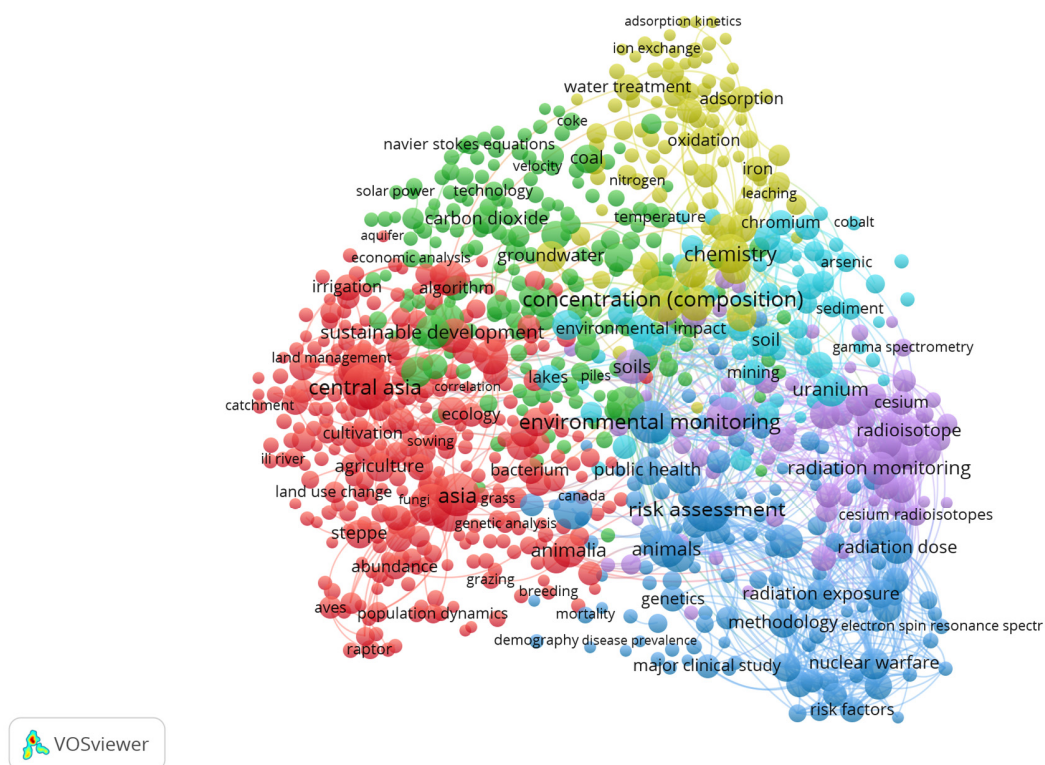

**Figure S18.** A keywords co-occurrence network for Environmental science.







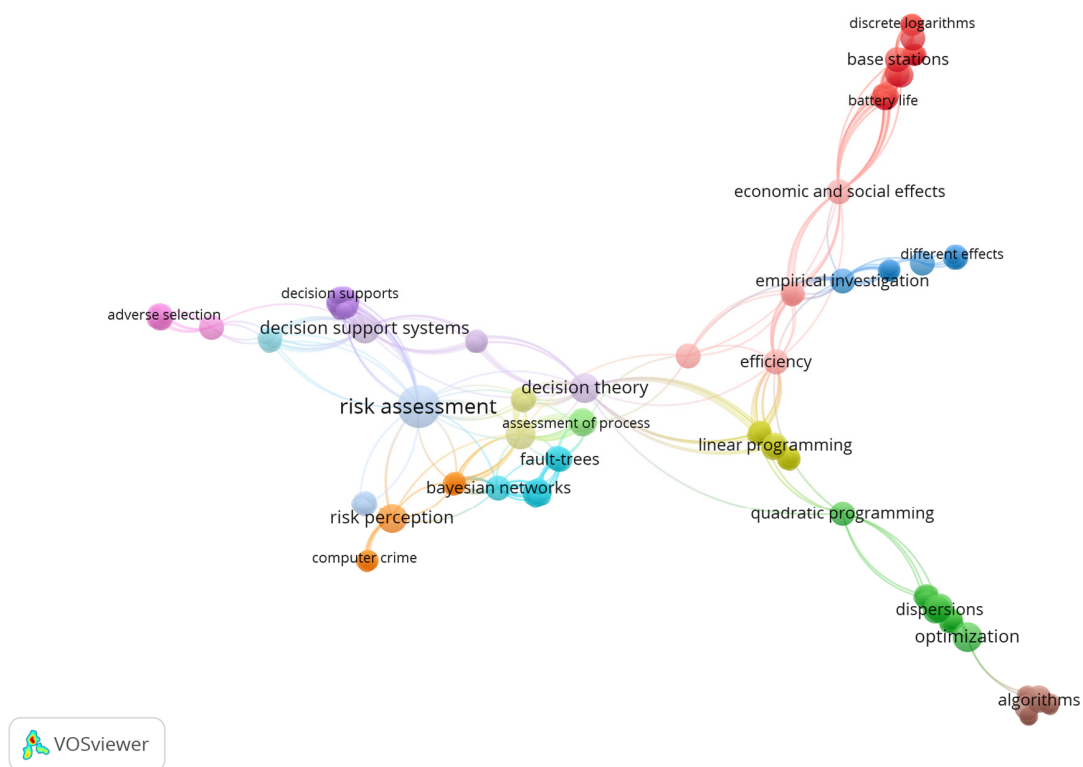

**Figure S21.** A keywords co-occurrence network for Decision sciences.

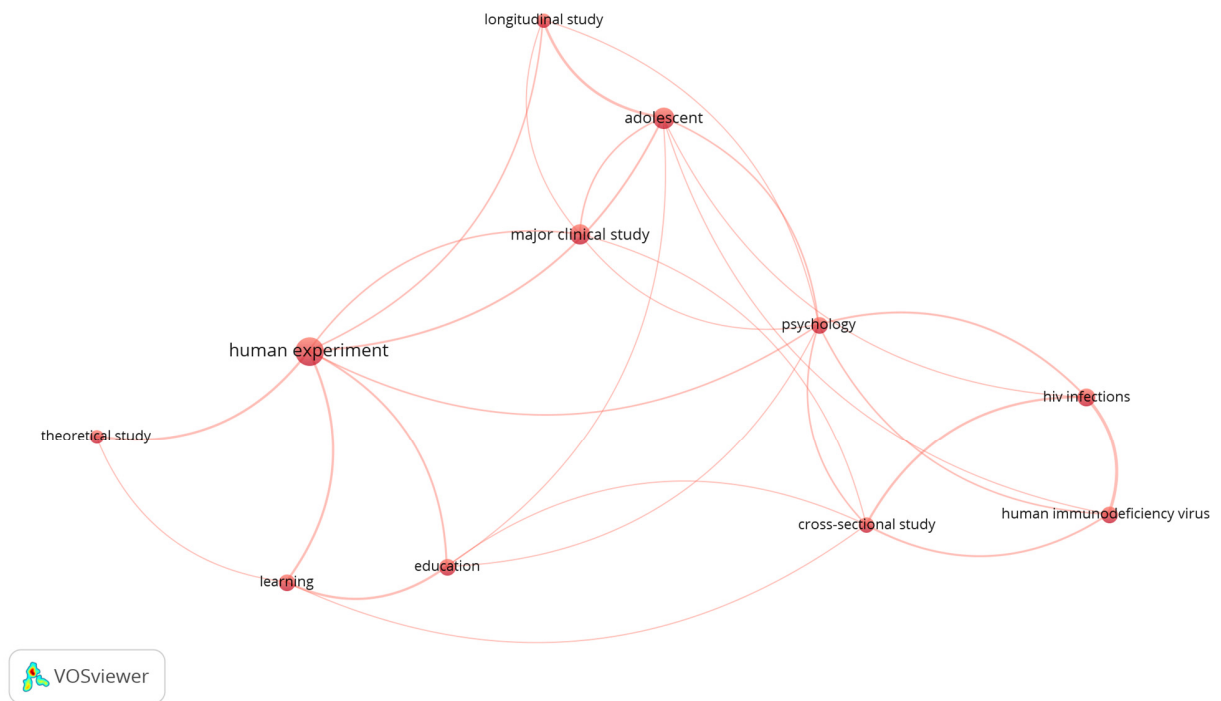

**Figure S22.** A keywords co-occurrence network for Psychology.

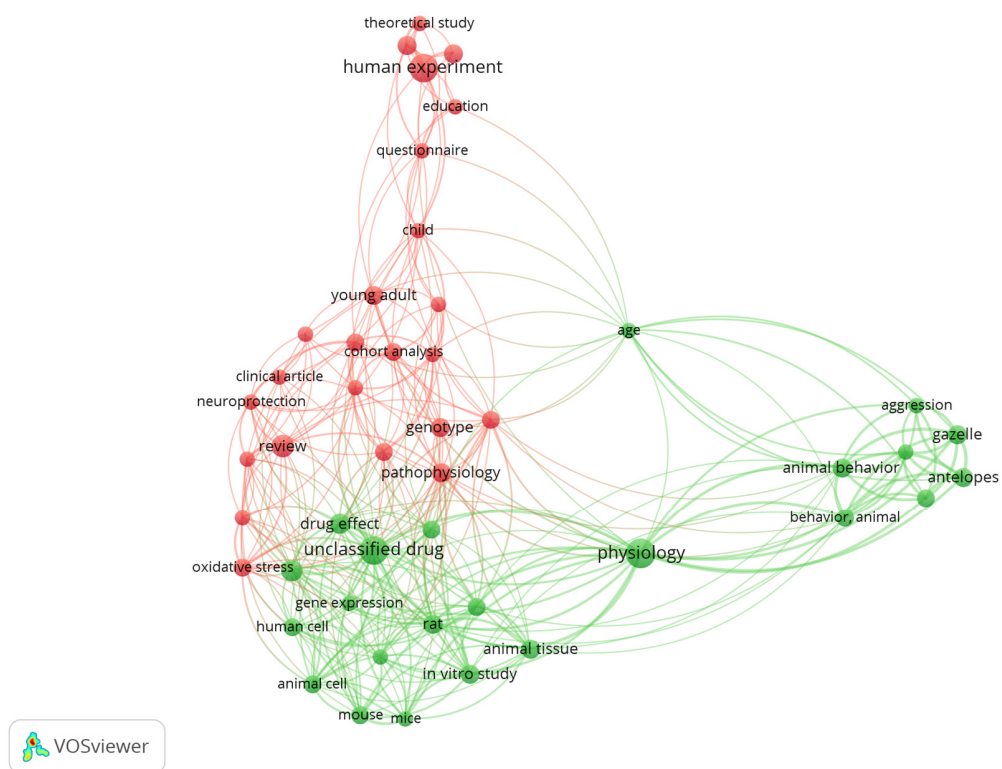

**Figure S23.** A keywords co-occurrence network for Neuroscience.

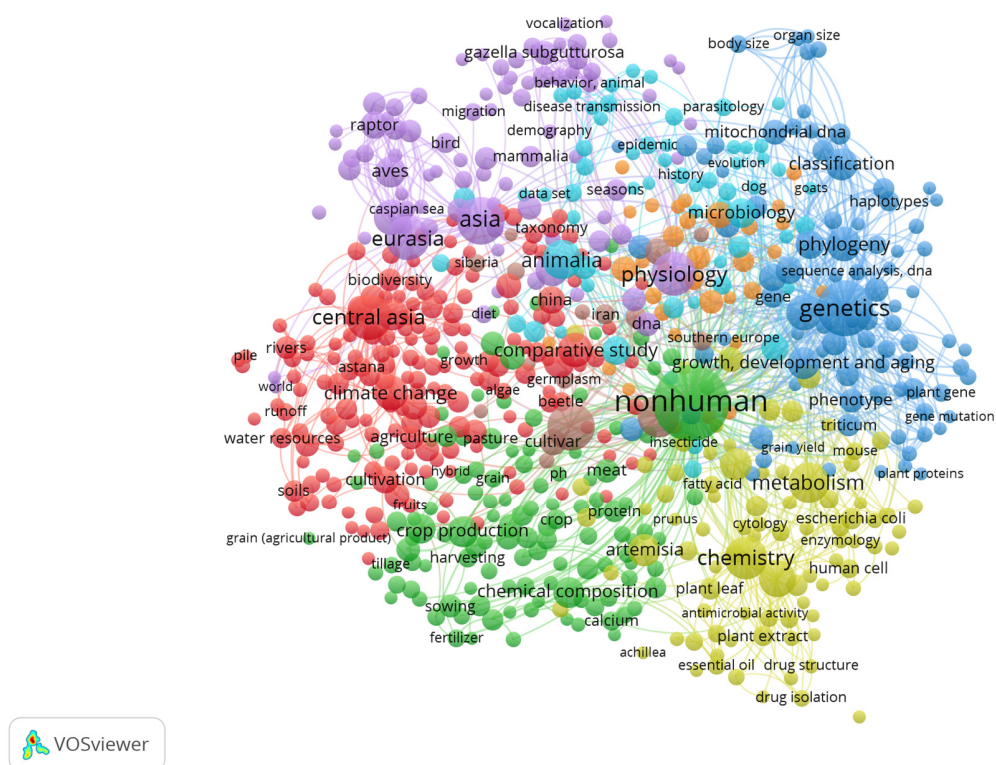

**Figure S24.** A keywords co-occurrence network for Agriculture and biological sciences.

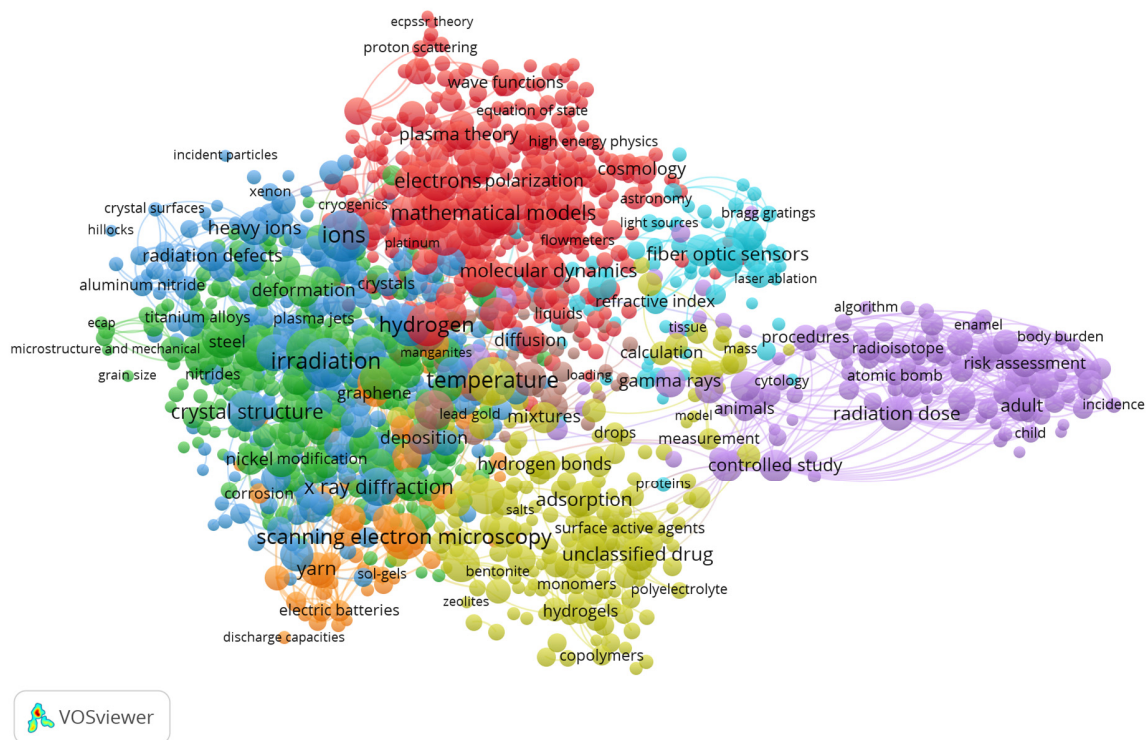

**Figure S25.** A keywords co-occurrence network for Physics and astronomy.
